# Supplementary material for: EctopicAtoh1expression drives Merkel cell production in embryonic, postnatal and adult epidermis
Source: Oxford University Press journal article supplement (doi:10.1242/dev.123141), 2015-01-01
Supplement: dev123141supp.pdf [file dev123141supp.pdf]

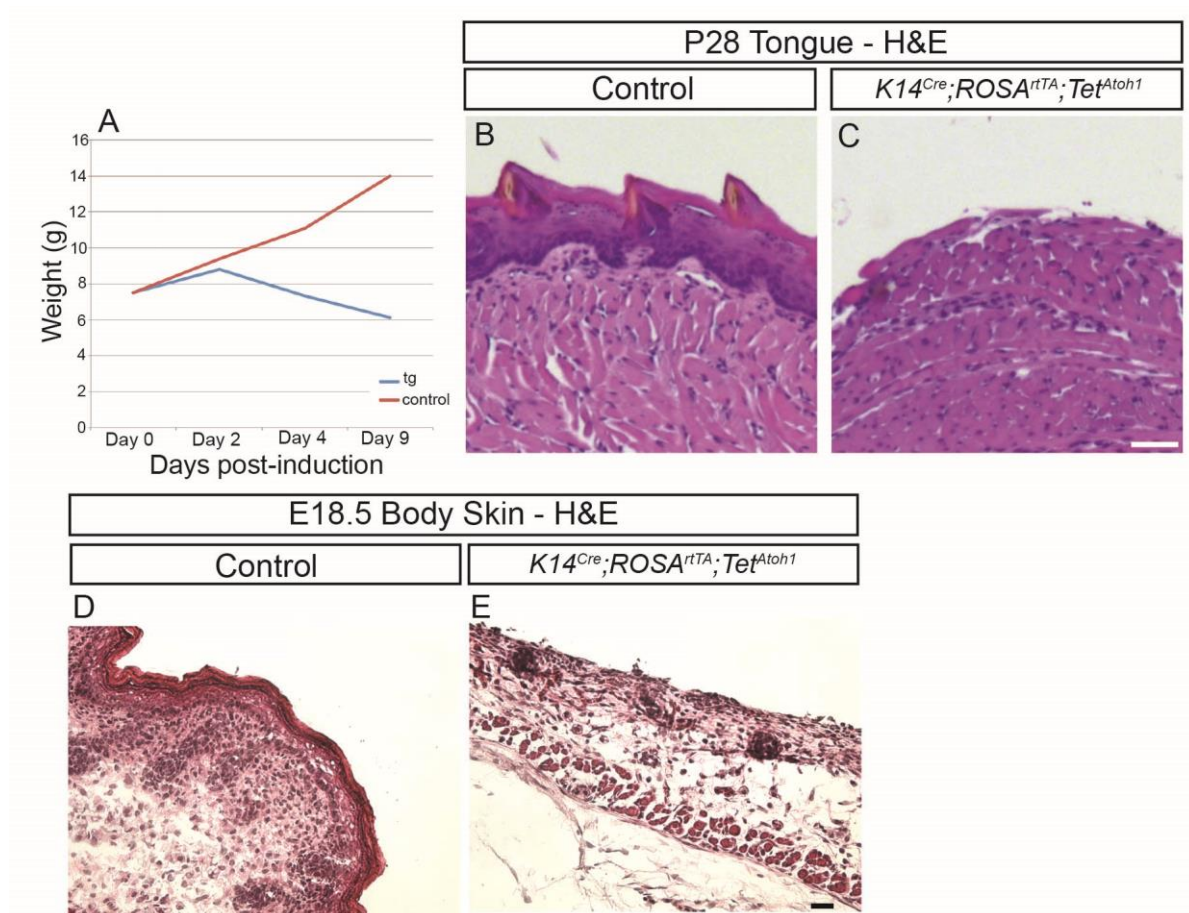

**Supplemental Figure 1. Excessive ectopic *Atoh1* over-expression damages the skin.** (A) Weight of P24-P28 *K14<sup>Cre</sup>; ROSA<sup>rtTA</sup>; Tet<sup>Atoh1</sup>* (n=7) and control (n=7) mice treated for 2 or 4 days with doxycycline. *K14<sup>Cre</sup>; ROSA<sup>rtTA</sup>; Tet<sup>Atoh1</sup>* (n=2) mice but not littermate controls (n=2) allowed to age past day 4 required euthanasia on day 9 due to emaciation. (B, C) Hematoxylin and eosin (H&E)-stained tongue tissue sections from P28 control littermate (B) and *K14<sup>Cre</sup>; ROSA<sup>rtTA</sup>; Tet<sup>Atoh1</sup>* mice (C) that received doxycycline for 4 days reveals acantholysis and epidermal loss in the latter. (D, E) H&E staining of skin from E18.5 control littermate (D) and *K14<sup>Cre</sup>; ROSA<sup>rtTA</sup>; Tet<sup>Atoh1</sup>* (E) embryos given doxycycline from E14.5-E18.5 demonstrates acantholysis and epidermal loss in the latter. Scale bars: 50µm.

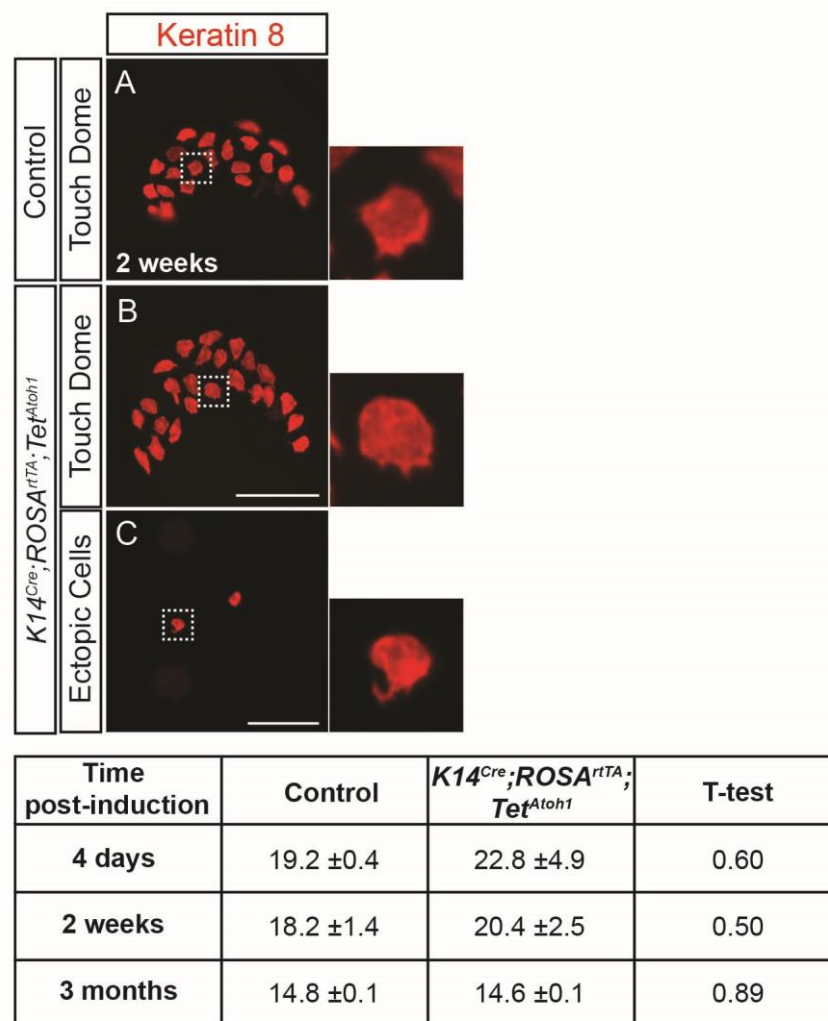

**Supplemental Figure 2. *Atoh1* induction does not affect Merkel cell morphology or number in touch domes, and ectopic K8+ cells have typical Merkel cell morphology.** K8 immunostaining in wholemount back skin 2 weeks post-doxycycline shows touch dome (A, B) and ectopic (C) K8+ cells in adult littermate control (A) and  $K14^{Cre}; ROSA^{rtTA}; Tet^{Atoh1}$  (B, C) mice. Boxed regions are shown at higher magnification to the right of each panel. Table shows average number of Merkel cells per touch dome  $\pm$  SEM at different time points post-doxycycline (n=2-3 mice/genotype). Scale bars: 50 $\mu$ m.

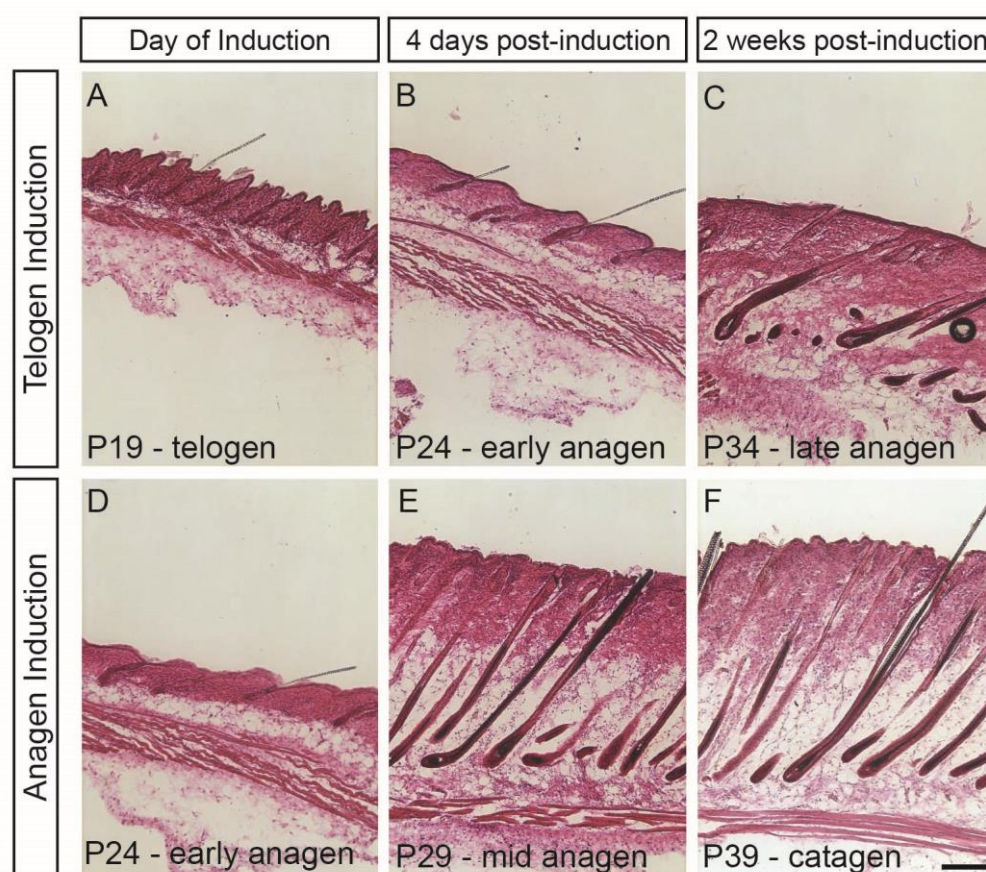

**Supplemental Figure 3.** *K14<sup>Cre</sup>; ROSA<sup>rtTA</sup>; Tet<sup>Atoh1</sup>* mouse hair cycle stages following induction during **telogen I and anagen I**. H&E staining of sectioned back skin from *K14<sup>Cre</sup>; ROSA<sup>rtTA</sup>; Tet<sup>Atoh1</sup>* mice at the time of (A, D), four days post- (B, E) and two weeks post- (C, F) doxycycline administration. Age at time of tissue harvest and hair cycle stage are indicated in each panel. Scale bar: 100µm.
